# Supplementary material
Source: publisher figshare collection journal article supplement (https://acs.figshare.com/ndownloader/files/3805897)
Supplement: Supplementary file 1 [file 3805897]

## Supporting Information

### **A trialkylphosphine-driven chemical transformation route to Ag and Bi based chalcogenides**

Shi-Kui Han,<sup>†, §</sup> Chao Gu,<sup>†, §</sup> Ming Gong,<sup>‡</sup> and Shu-Hong Yu<sup>†\*</sup>

<sup>†</sup> Division of Nanomaterials and Chemistry, Hefei National Laboratory for Physical Sciences at Microscale, Collaborative Innovation Center of Suzhou Nano Science and Technology, Department of Chemistry, University of Science and Technology of China, Hefei, Anhui 230026, P. R. China.

<sup>‡</sup> Lab of Mechanical and Material Science, School of Engineering Science, University of Science and Technology of China, Hefei 230026, P. R. China

<sup>§</sup> The authors contributed equally.

\* Corresponding Author.

Email: shyu@ustc.edu.cn

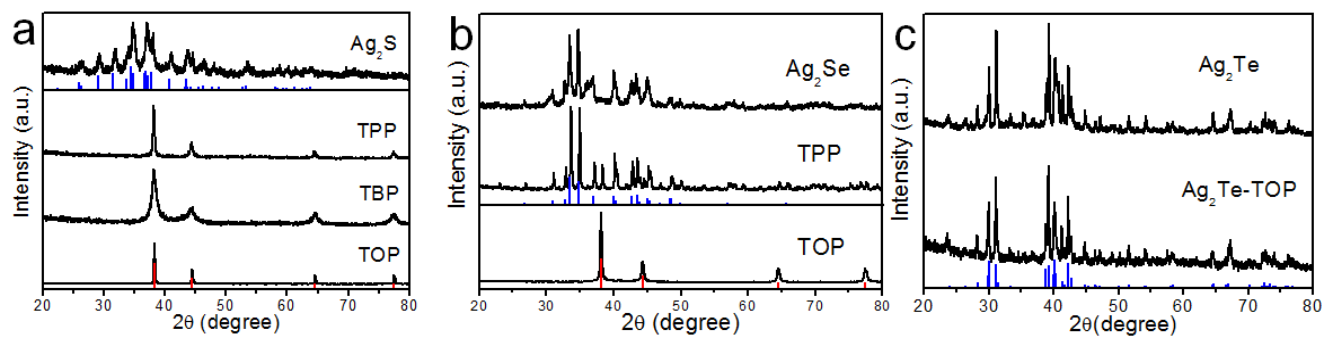

**Figure S1.** (a) XRD patterns of  $\text{Ag}_2\text{S}$ , (b)  $\text{Ag}_2\text{Se}$ , (c)  $\text{Ag}_2\text{Te}$  based transformation reactions with different reductants of TPP, TBP, and TOP.

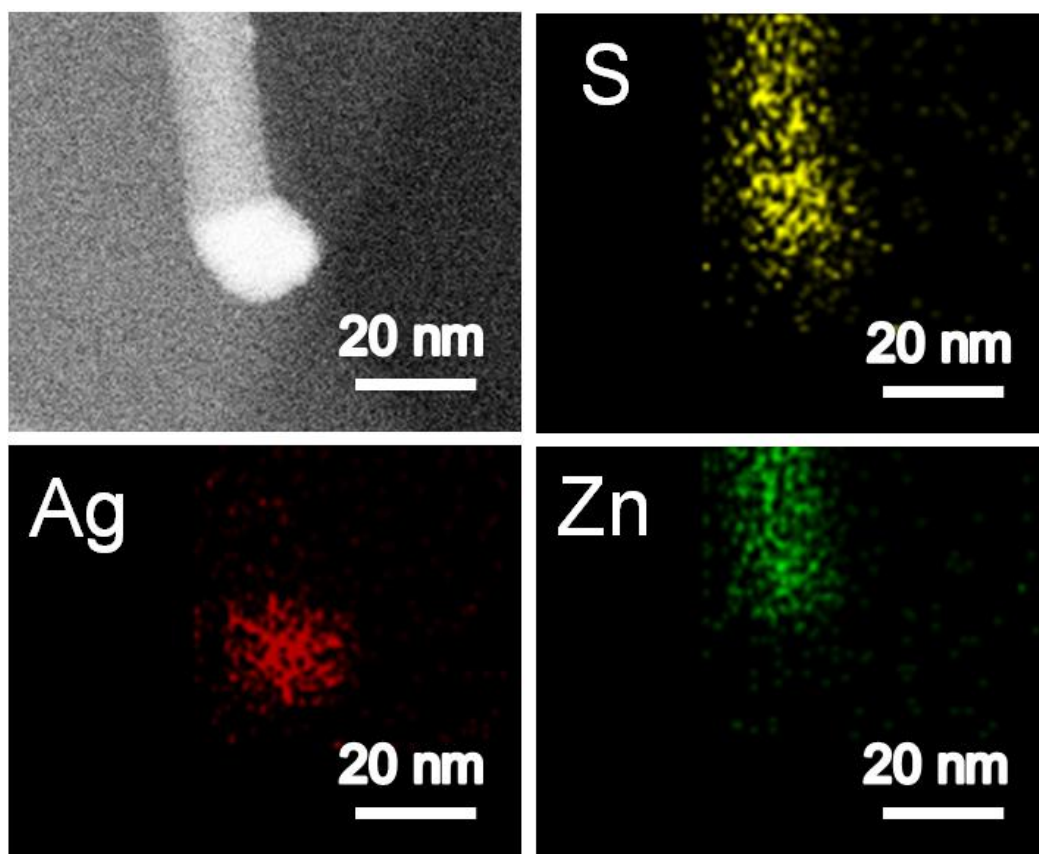

**Figure S2.** STEM-EDS elemental mapping images of the as-obtained  $\text{Ag}_2\text{S}$ -ZnS heteronanocrystals.

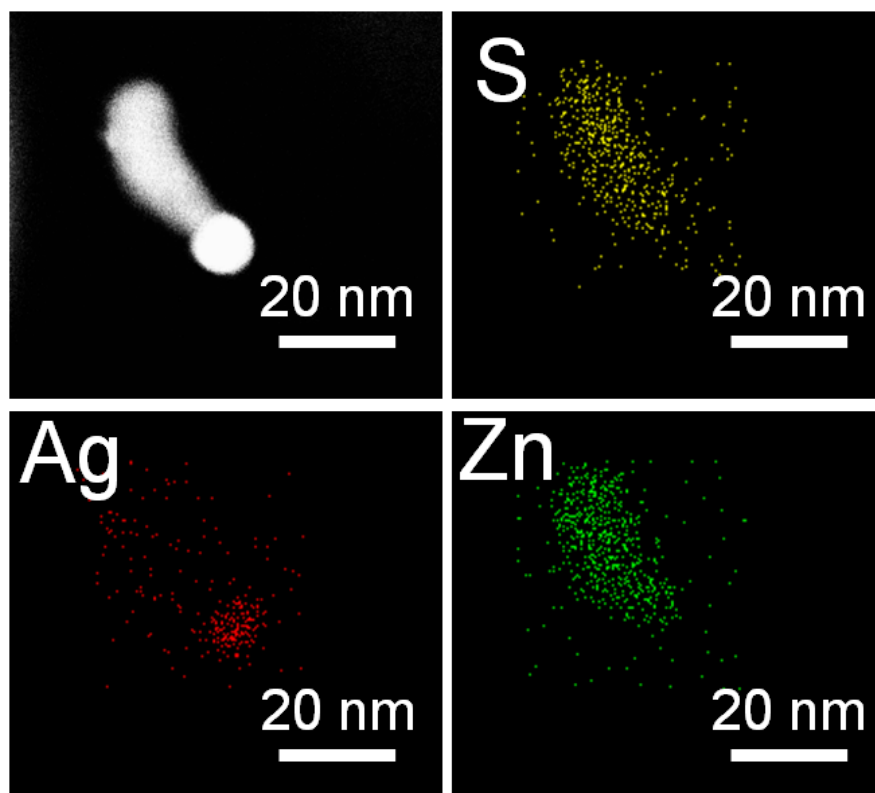

**Figure S3.** STEM-EDS elemental mapping images of the as-obtained Ag-ZnS heteronanocrystals.

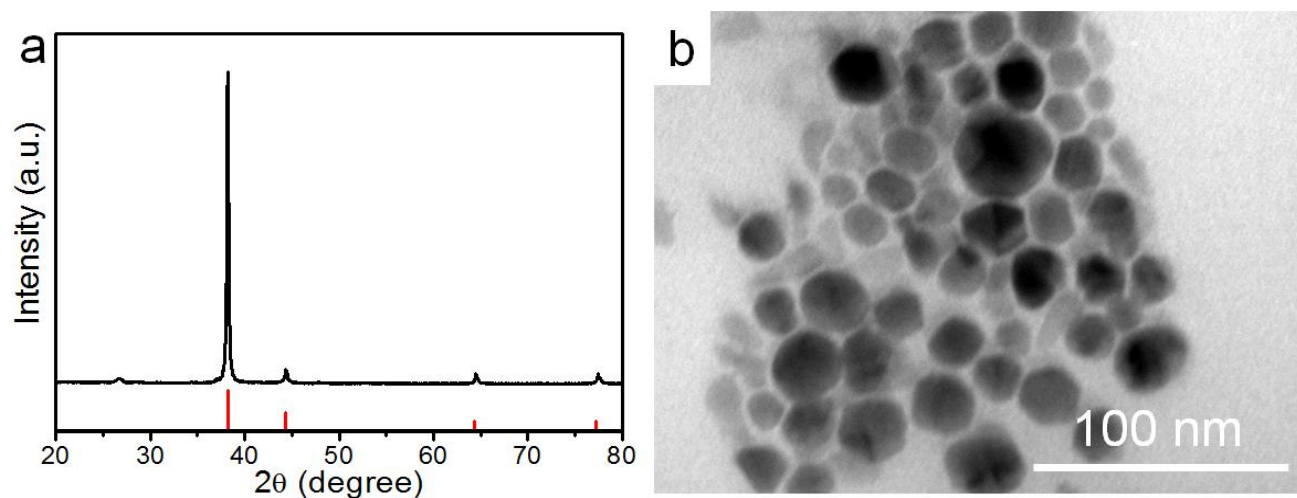

**Figure S4.** (a) XRD pattern, and (b) TEM image of the Ag nanostructures obtained by chemical transformation of  $\text{AgInS}_2$  nanocrystals.

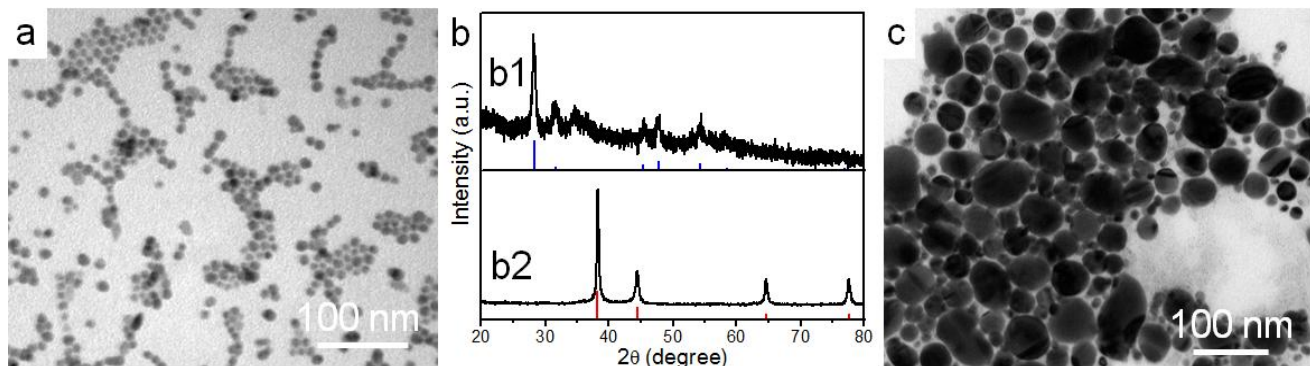

**Figure S5.** (a) TEM image of the  $\text{AgFeS}_2$  nanocrystals, (b) XRD patterns of  $\text{AgFeS}_2$  (b1) before chemical transformation, and (b2) after chemical transformation, (c) TEM image of the Ag nanostructures obtained by chemical transformation of  $\text{AgFeS}_2$  nanocrystals.

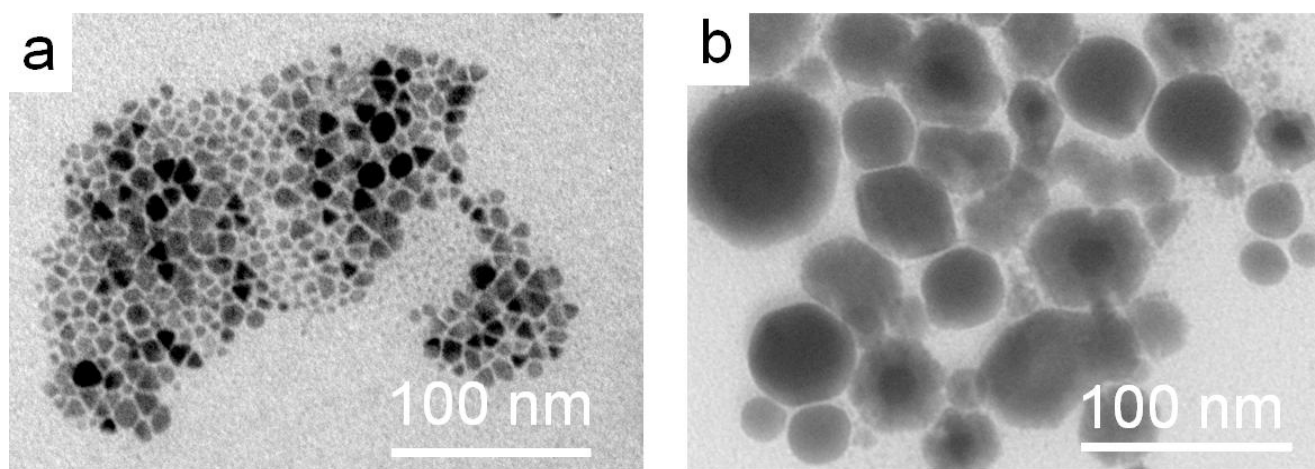

**Figure S6.** TEM image (a) before chemical transformation, and (b) after chemical transformation of the  $\text{AgBiSe}_2$  nanocrystals.

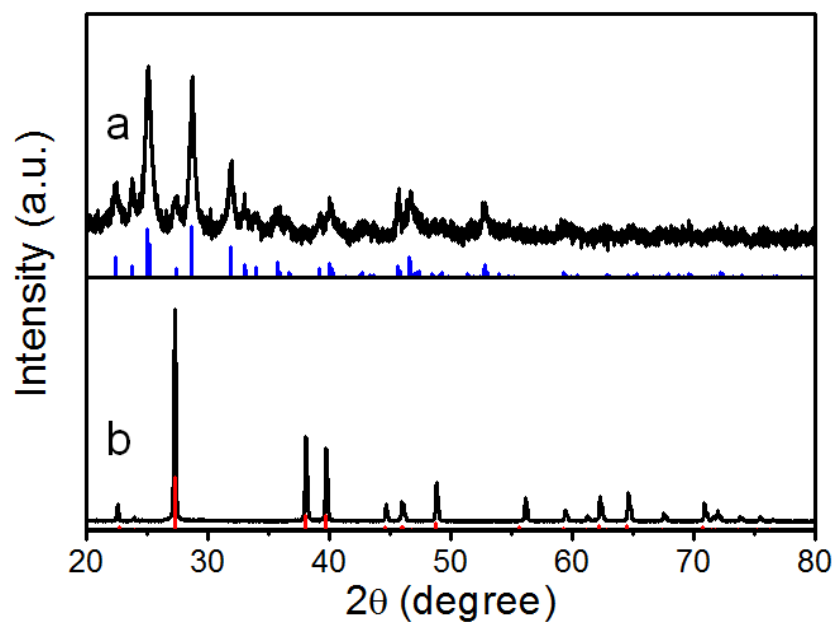

**Figure S7.** XRD patterns of  $\text{Bi}_2\text{S}_3$  nanocrystals (a) before chemical transformation, and (b) after chemical transformation.

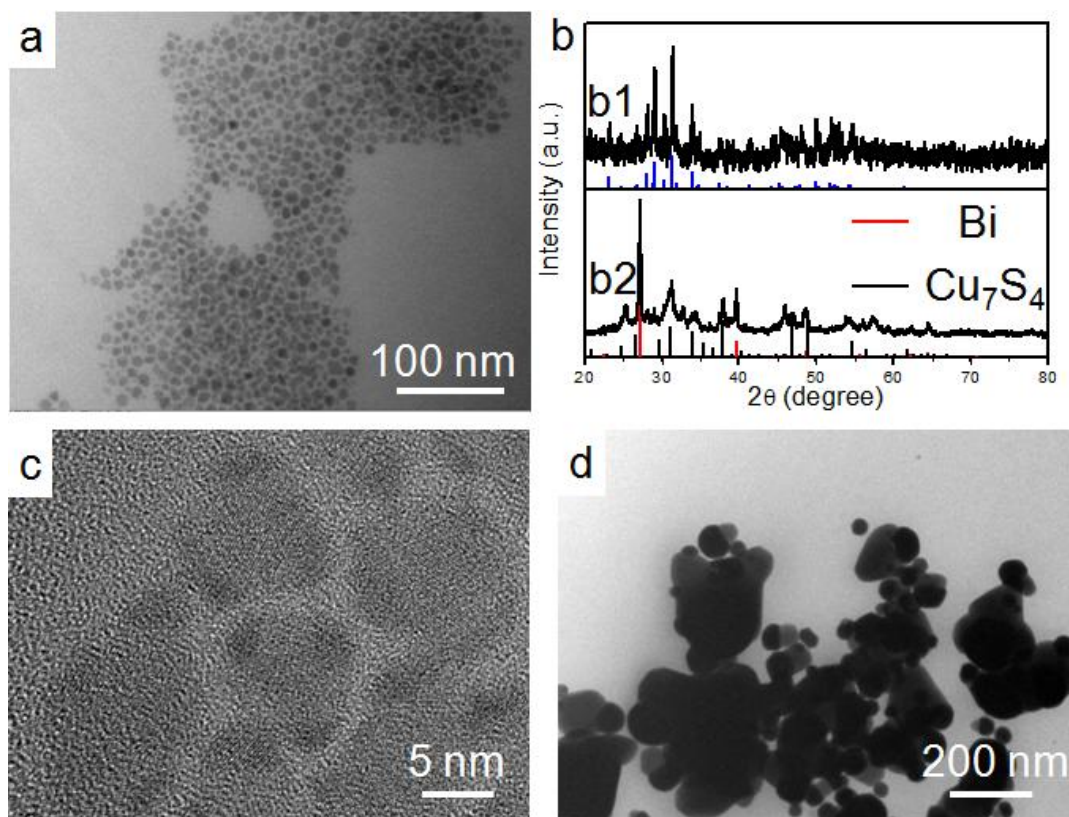

**Figure S8.** (a) TEM image, (b) XRD patterns of  $\text{Cu}_3\text{BiS}_3$  nanocrystals (b1) before chemical transformation, and (b2) after chemical transformation, TEM images of the chemical transformation process of  $\text{Cu}_3\text{BiS}_3$  nanocrystals for different time: (c) 10 min, (d) 30 min.
